# Supplementary material for: Solvent effect on the competition between weak and strong interactions in phenol solutions studied by near-infrared spectroscopy and DFT calculations
Source: Royal Society of Chemistry journal article supplement (doi:10.1039/d1cp02103f), 2021-01-01
Supplement: d1cp02103f2.pdf [file d1cp02103f2.pdf]

# Solvent Effect on Competition Between Weak and Strong Interactions in Phenol Solutions Studied by Near-infrared Spectroscopy

## Supplementary Information

*Mirosław Antoni Czarnecki,<sup>1\*</sup> Yusuke Morisawa,<sup>2\*</sup> Yukiteru Katsumoto,<sup>3</sup> Tomoyuki Takaya,<sup>4</sup>  
Swapnil Singh,<sup>1</sup> Harumi Sato<sup>5</sup>, and Yukihiro Ozaki<sup>4,6\*</sup>*

<sup>1</sup>Faculty of Chemistry, University of Wrocław, F. Joliot-Curie, 14, Wrocław 50-383, Poland.

<sup>2</sup>Department of Chemistry, School of Science and Engineering, Kindai University, Kowakae,  
Higashi-Osaka, Osaka 577-8502, Japan

<sup>3</sup>Department of Chemistry, School of Science, Fukuoka University, Nanakuma, Jyonan-Ku,  
Fukuoka 814-0180, Japan

<sup>4</sup>School of biological and Environmental Sciences, Kwansei Gakuin University, Sanda,  
Hyogo 669-1337, Japan

<sup>5</sup>Graduate School of Human Development and Environment, Kobe University, 3-11,  
Tsurukabuto, Nada-ku, Kobe 657-8501, Japan

<sup>6</sup>Toyota Physical and Chemical Research Institute, Yokomichi, Nagakute, Aichi 480-1192,  
Japan

Corresponding authors:

Yukihiro Ozaki (yukiz89016@gmail.com)

Mirosław A. Czarnecki (mirosław.czarnecki@chem.uni.wroc.pl)

Yusuke Morisawa (morisawa@chem.kindai.ac.jp)

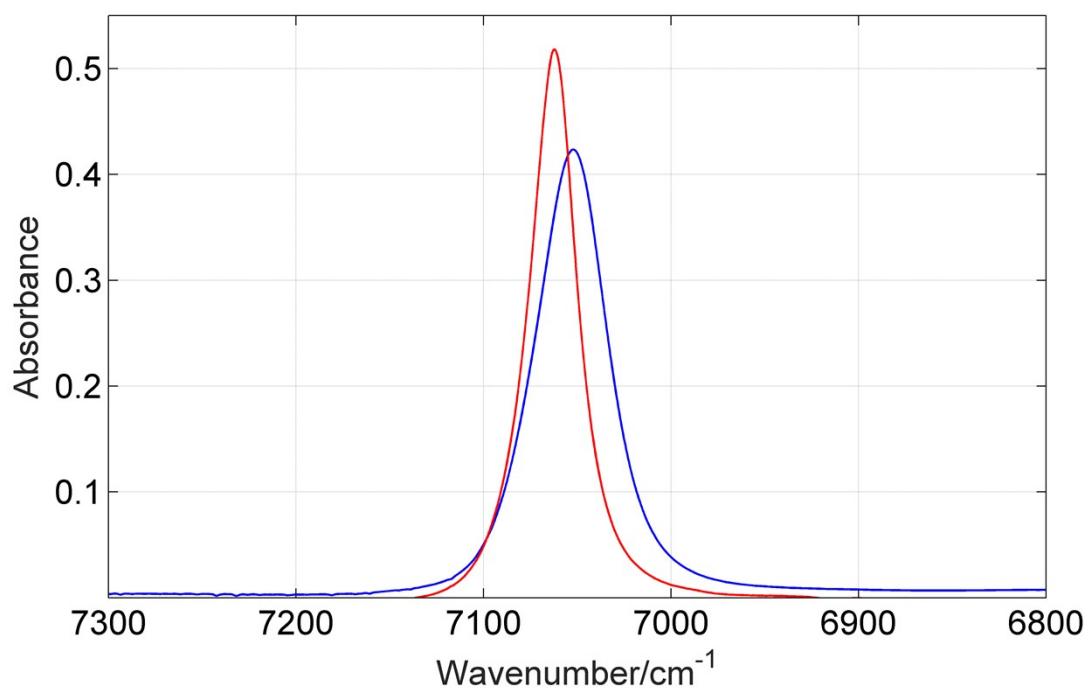

Figure SI1. NIR spectra of phenol in CCl<sub>4</sub> (blue line) and cyclohexane (red line) solutions at 0.05M.

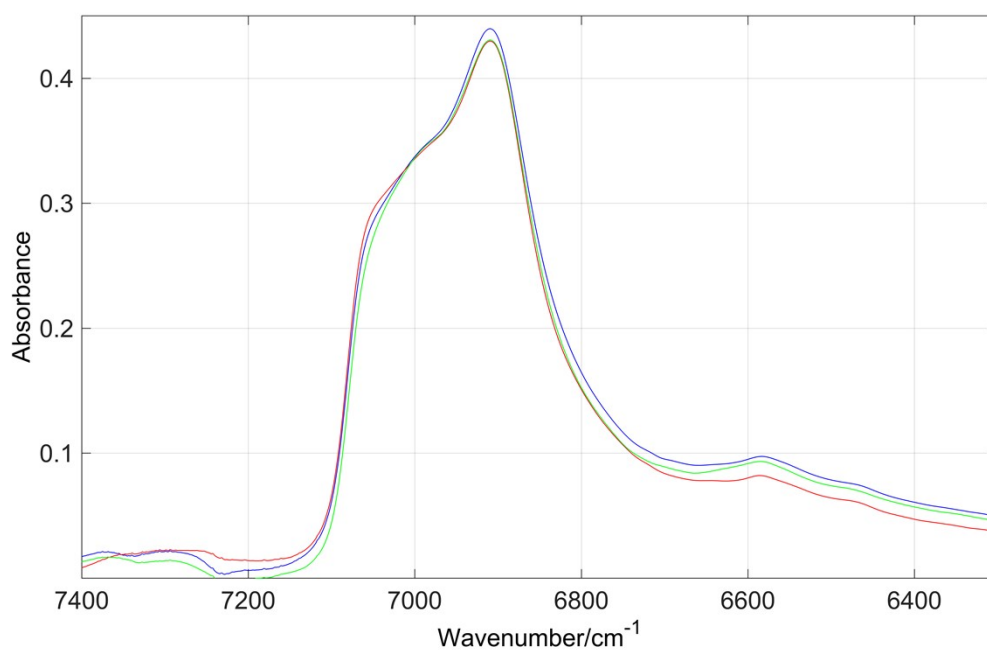

Figure SI2. NIR spectra of phenol in *o*-xylene (green), *m*-xylene (blue) and *p*-xylene (red) at the concentration of 1 M after subtraction of the spectrum of the solvent.

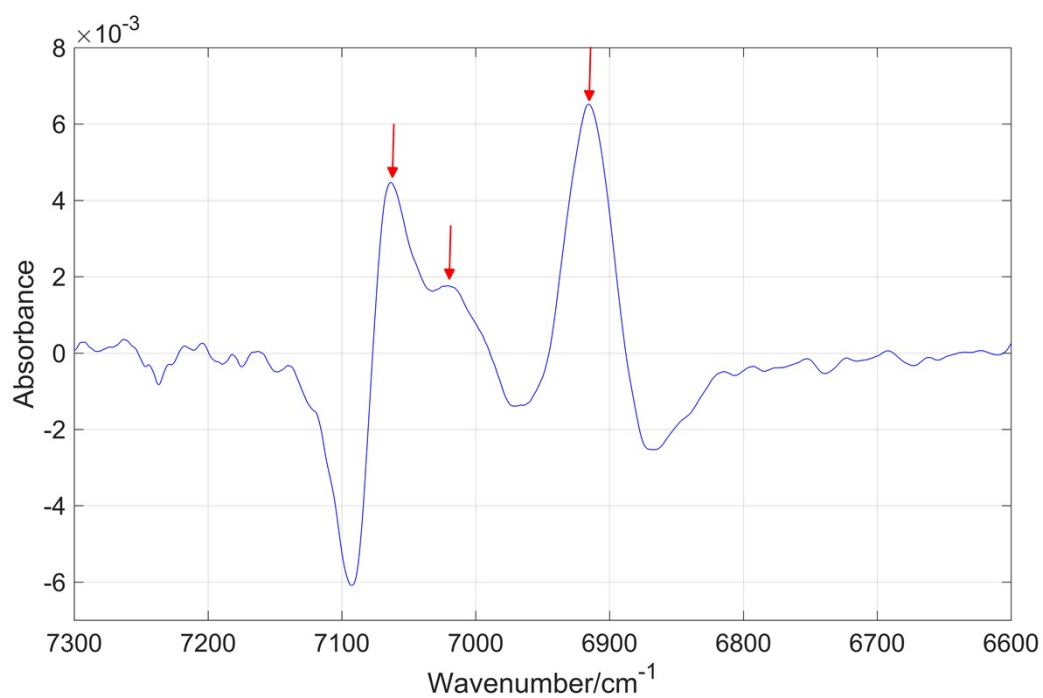

Fig. SI3. Second derivative NIR spectrum (multiplied by -1) of phenol in toluene at concentration of 0.5 M. The red arrows indicate peak positions.

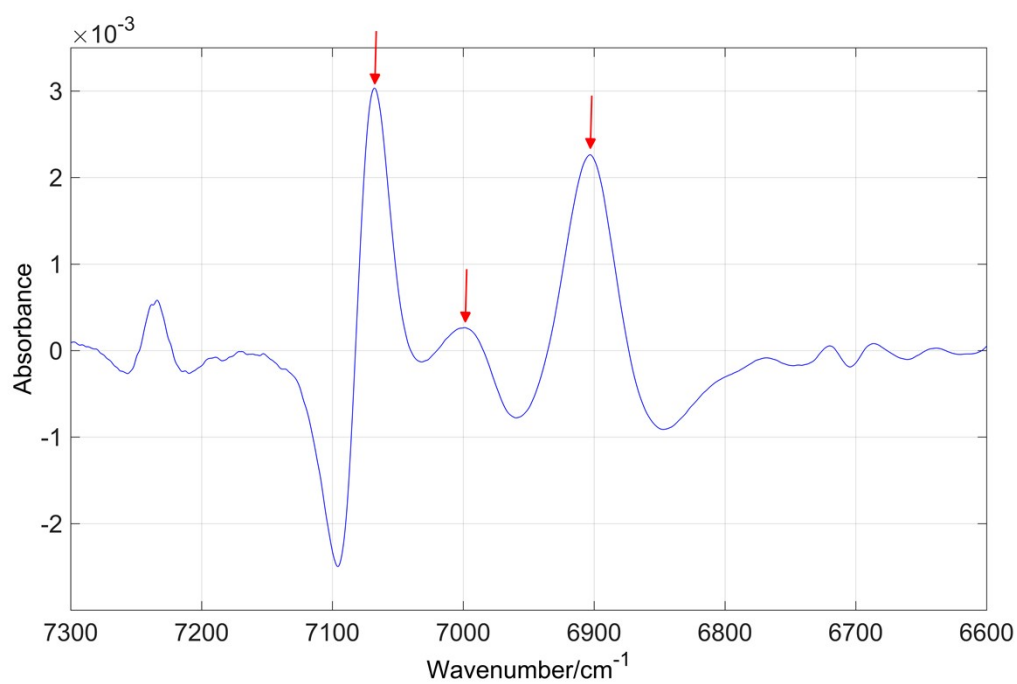

Fig. SI4. Second derivative NIR spectrum (multiplied by -1) of phenol in o-xylene at concentration of 1 M after subtraction of the spectrum of the solvent. The red arrows indicate peak positions.

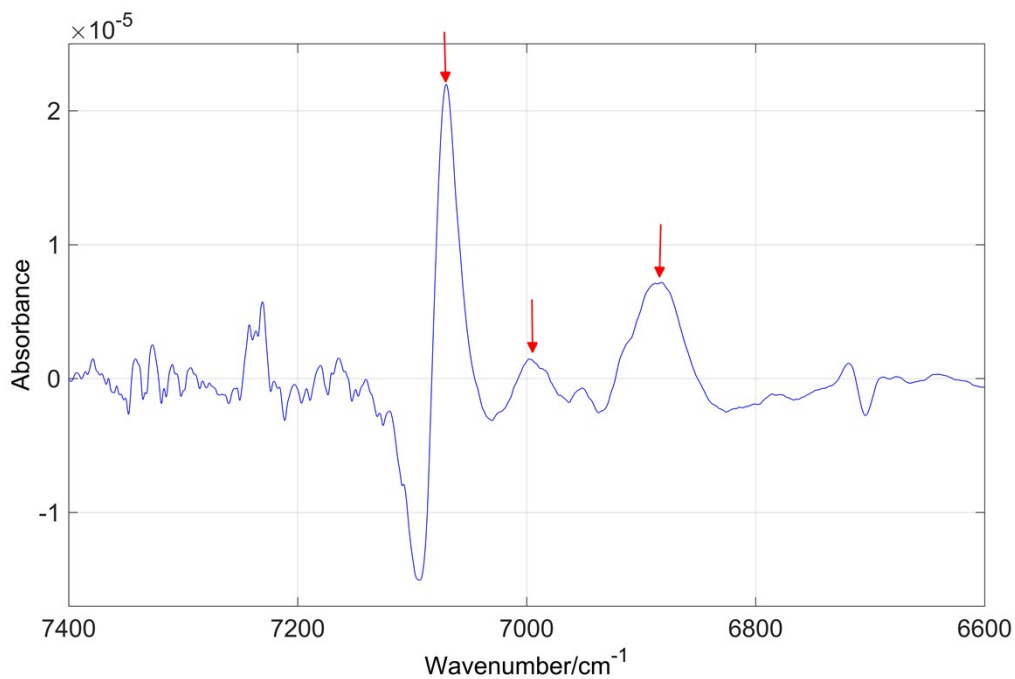

Fig. SI5. Second derivative NIR spectrum (multiplied by -1) of phenol in mesitylene at concentration of 1 M after subtraction of the spectrum of the solvent. The red arrows indicate peak positions.

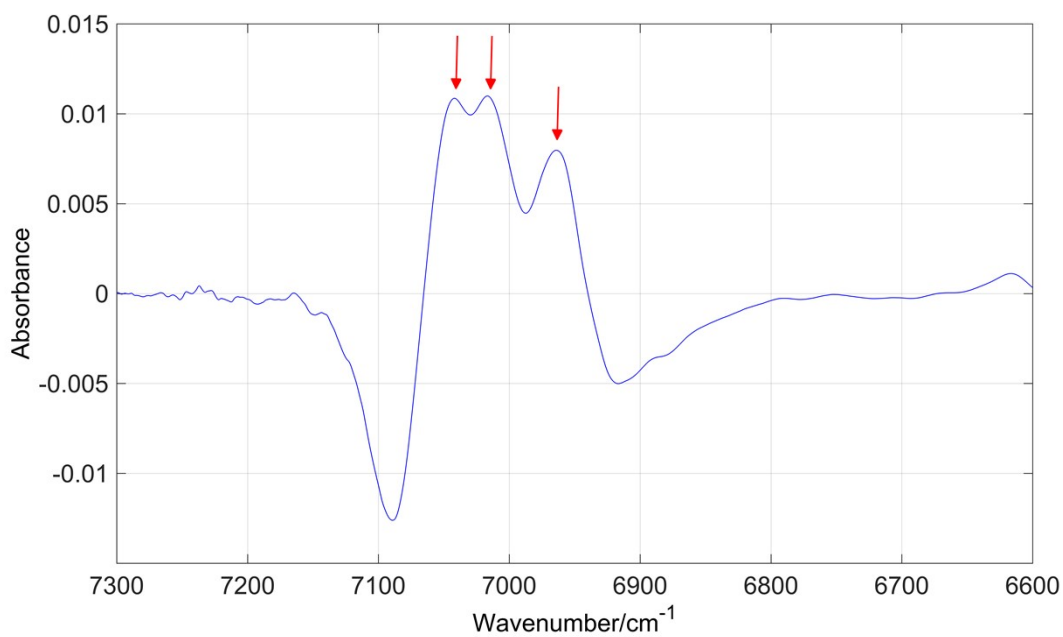

Fig. SI6. Second derivative NIR spectrum (multiplied by -1) of phenol in chlorobenzene at concentration of 0.5 M. The red arrows indicate peak positions.

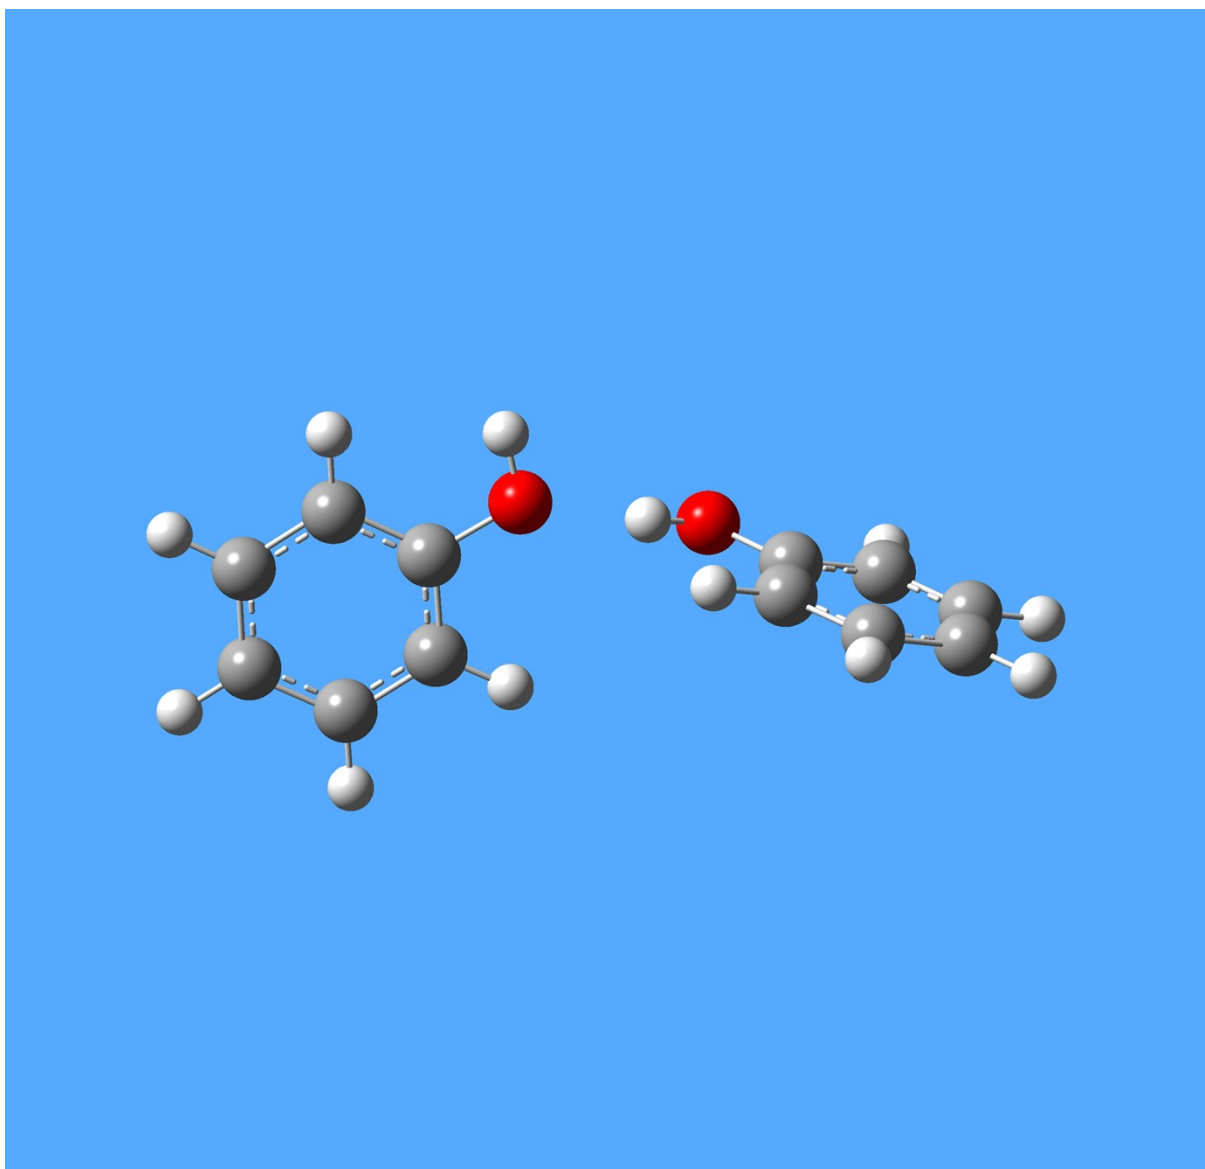

Figure S7. Optimized (B3LYP/6-311++G(2df,2pd)) structure of dimer of phenol.

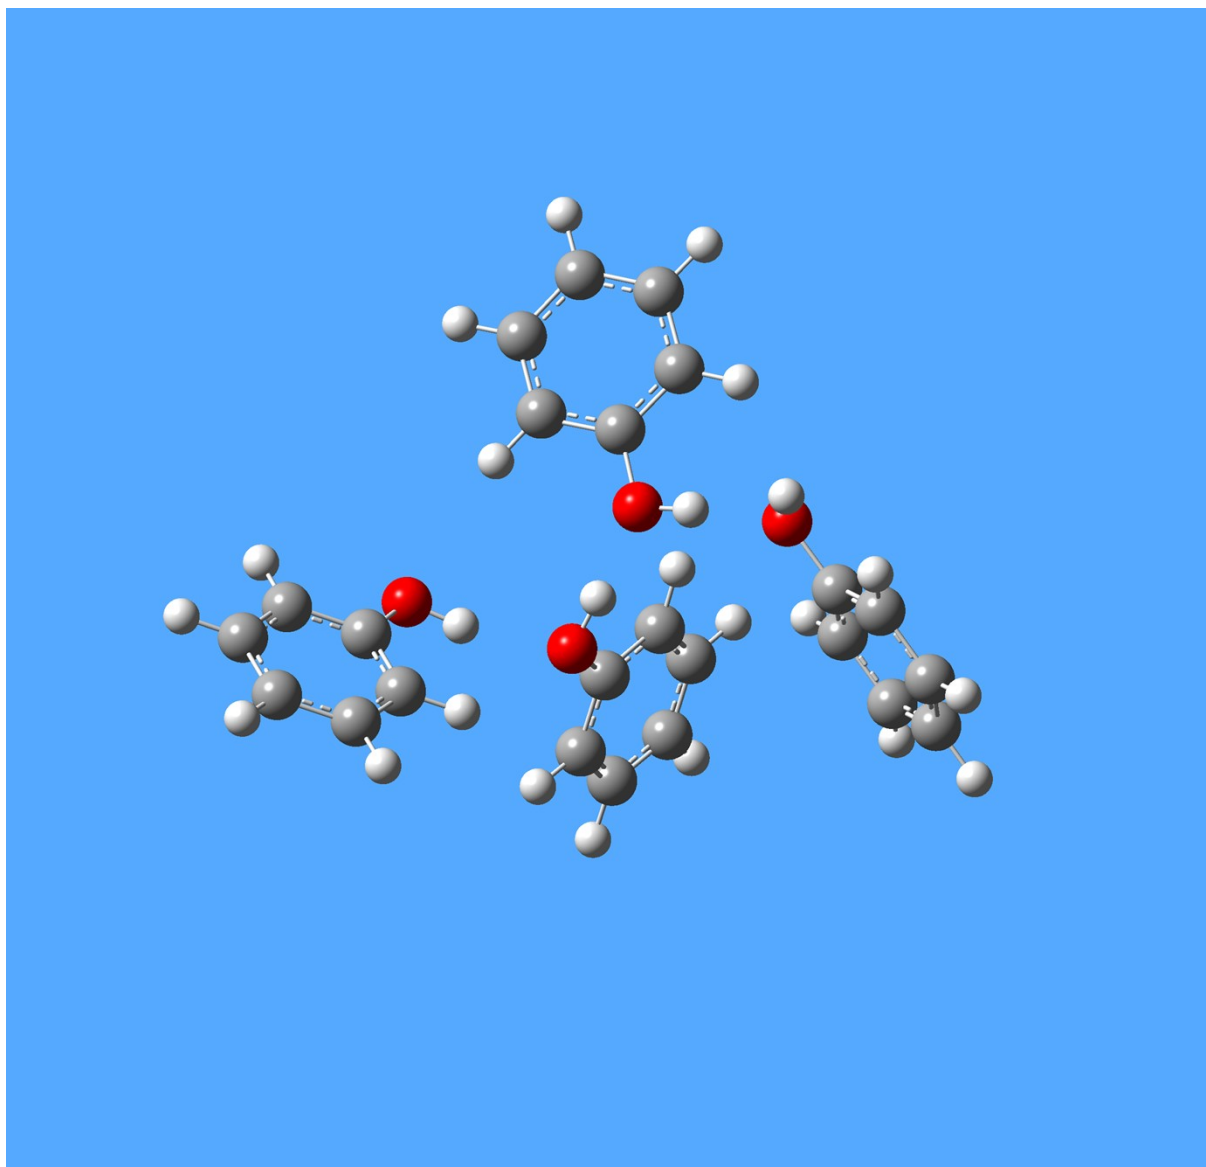

Figure S8. Optimized (B3LYP/6-311++G(2df,2pd)) structure of linear tetramer of phenol.

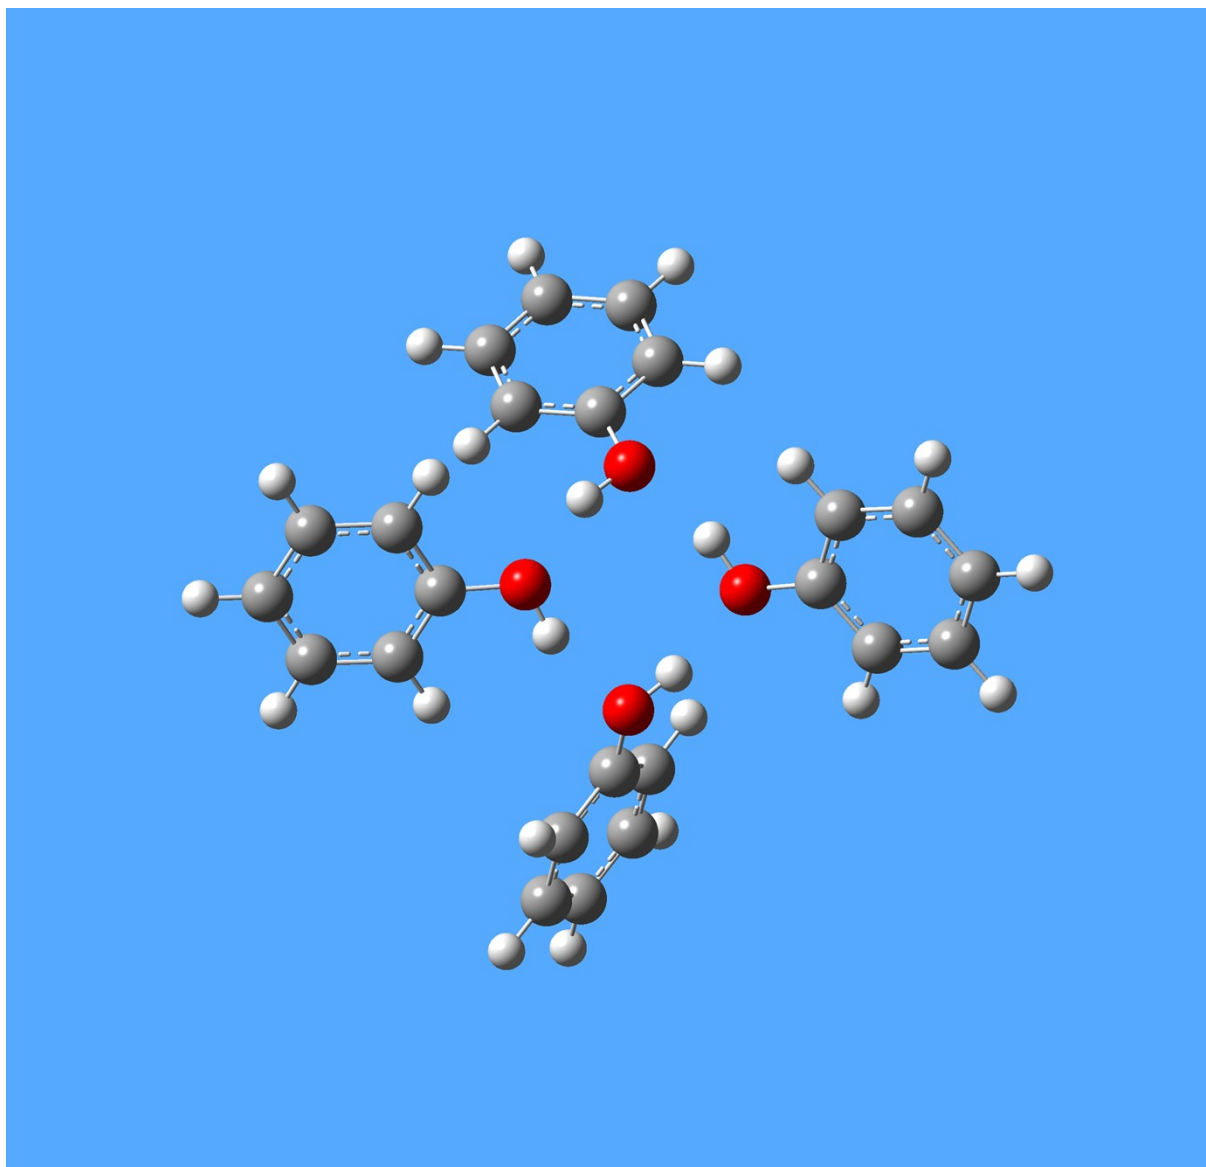

Figure S9. Optimized (B3LYP/6-311++G(2df,2pd)) structure of cyclic tetramer of phenol.



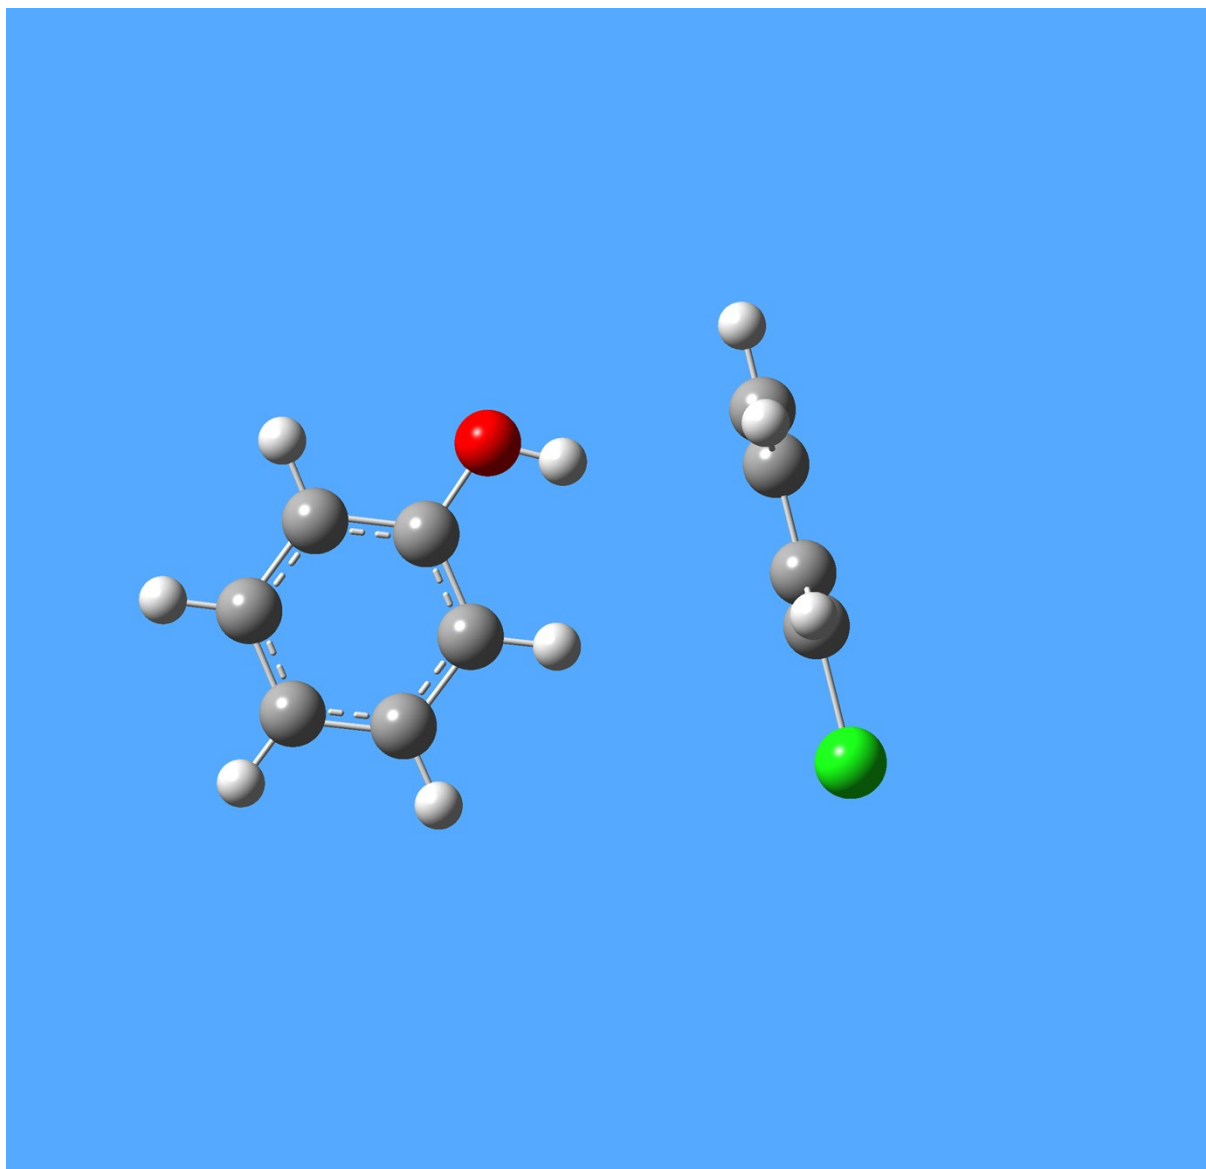

Figure S10. Optimized (B3LYP/6-311++G(2df,2pd)) structure of phenol-chlorobenzene complex.

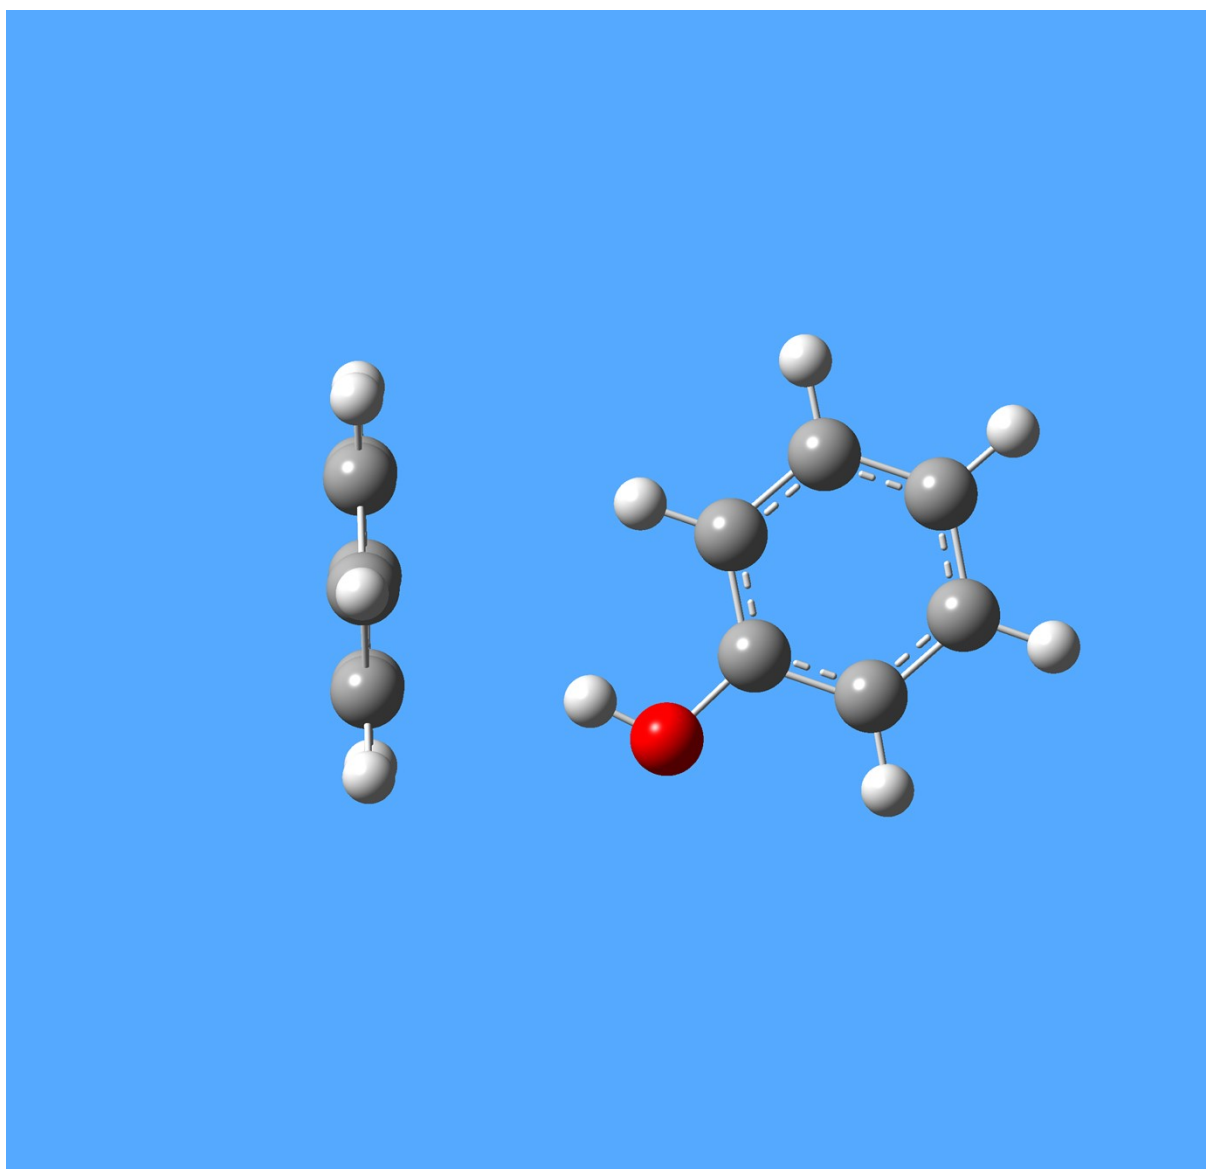

Figure S11. Optimized (B3LYP/6-311++G(2df,2pd)) structure of phenol-benzene complex.

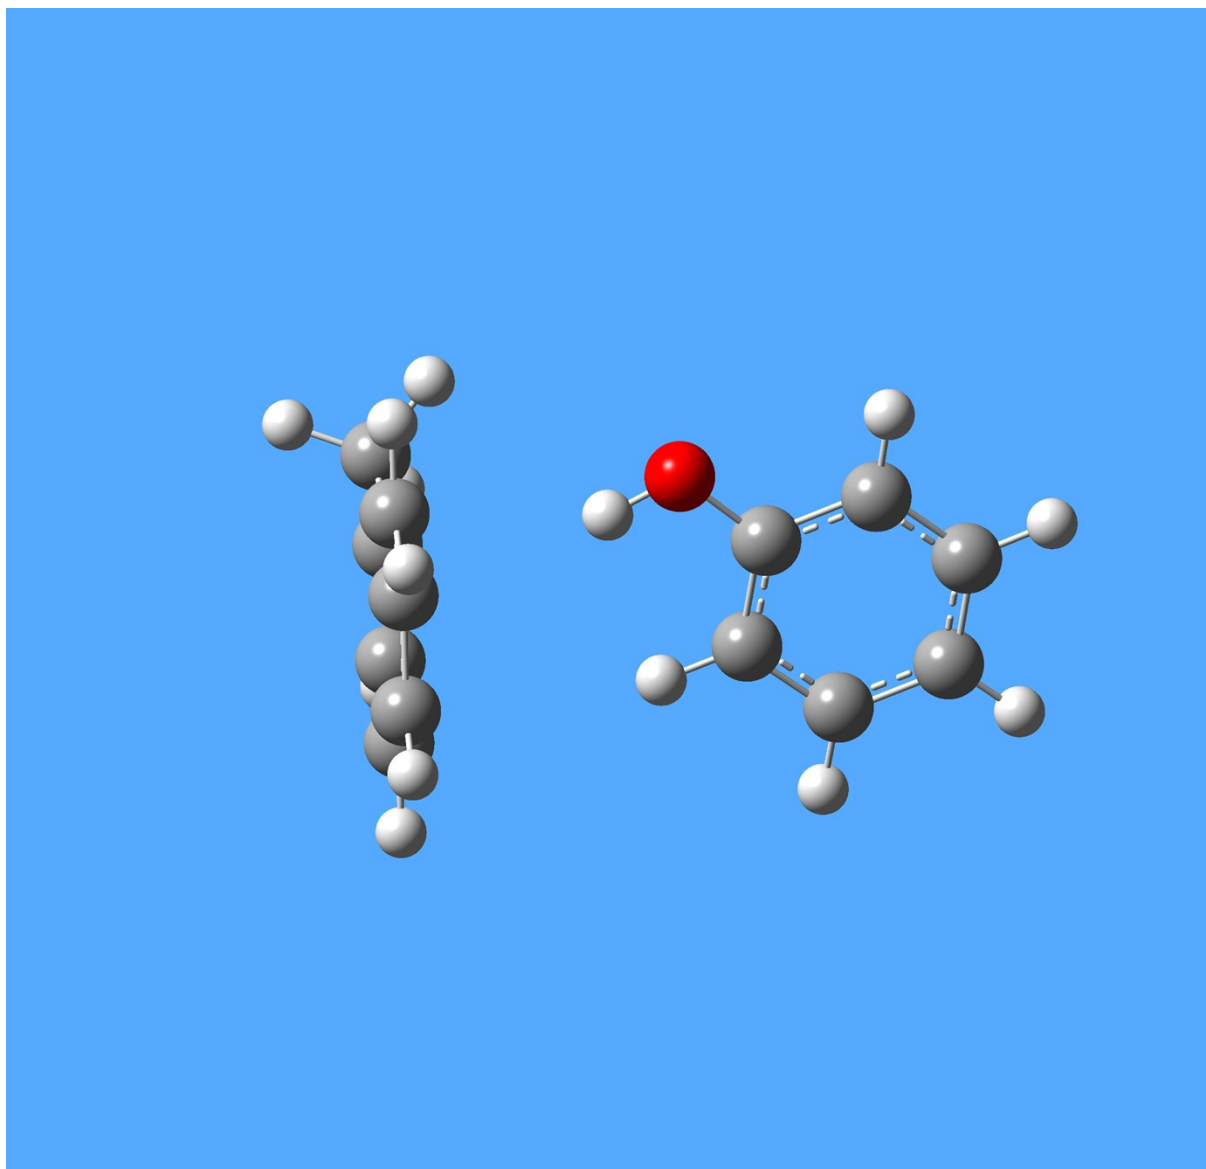

Figure S12. Optimized (B3LYP/6-311++G(2df,2pd)) structure of phenol-toluene complex.

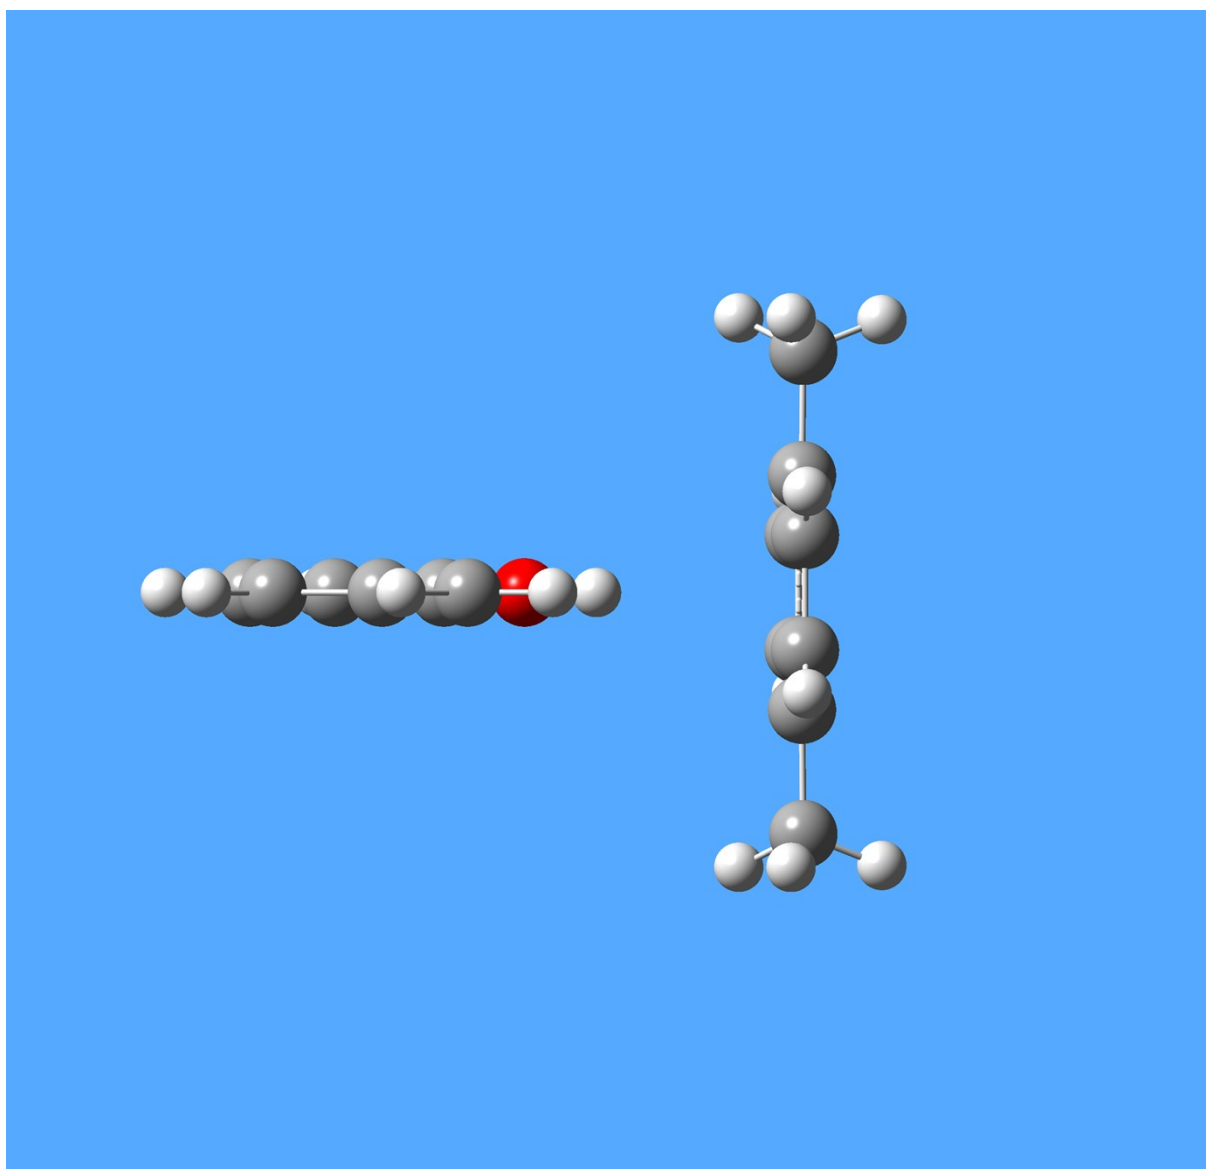

Figure S13. Optimized (B3LYP/6-311++G(2df,2pd)) structure of phenol-p-xylene complex.

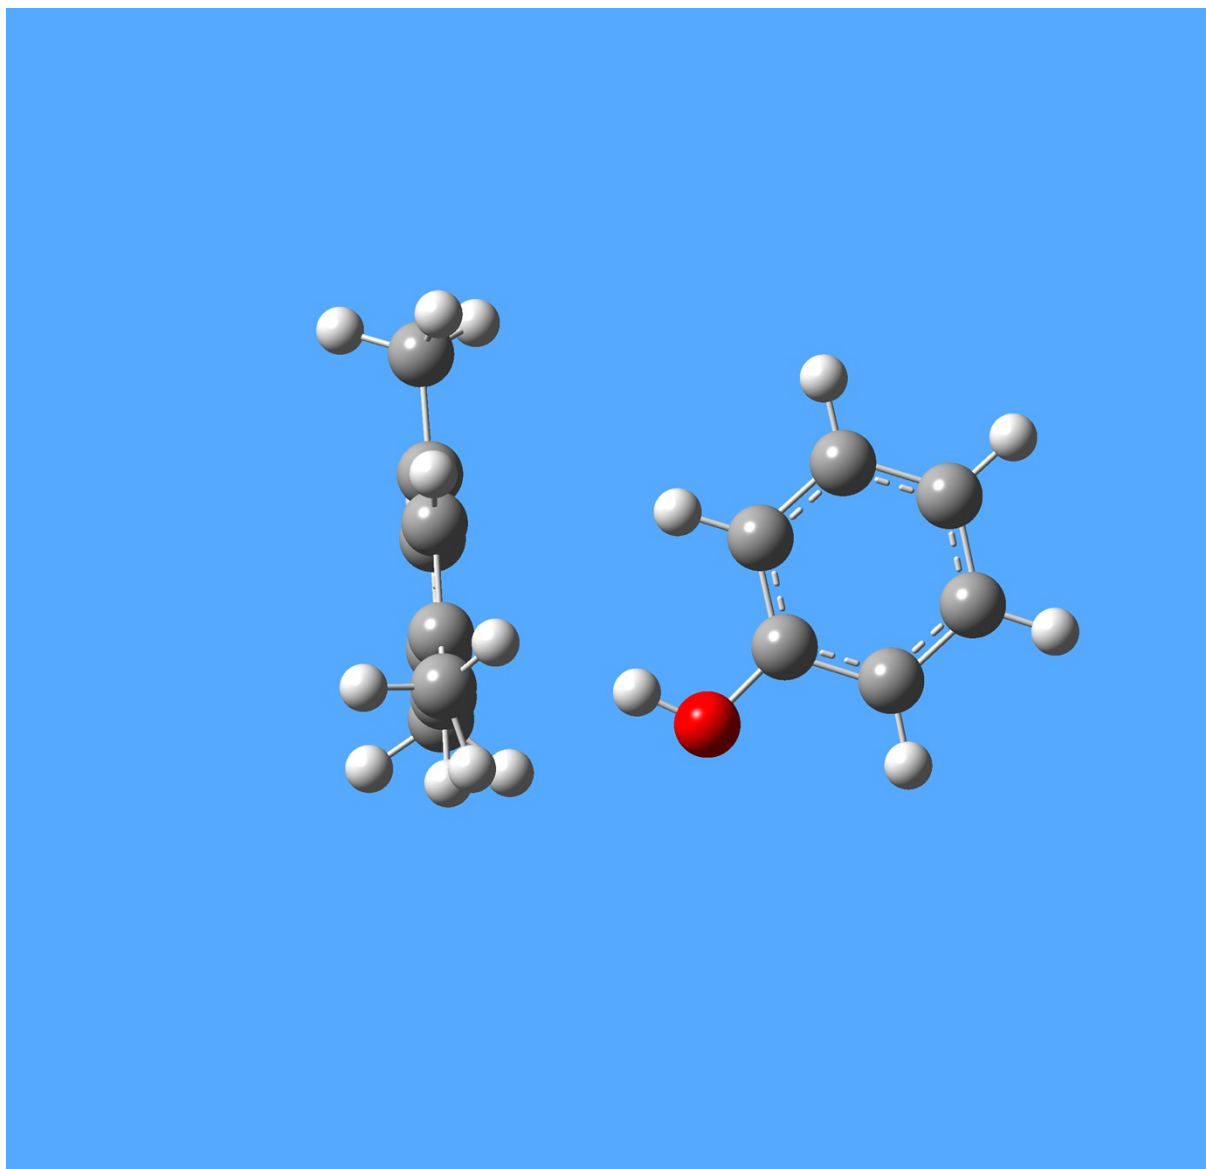

Figure S14. Optimized (B3LYP/6-311++G(2df,2pd)) structure of phenol-mesitylene complex.

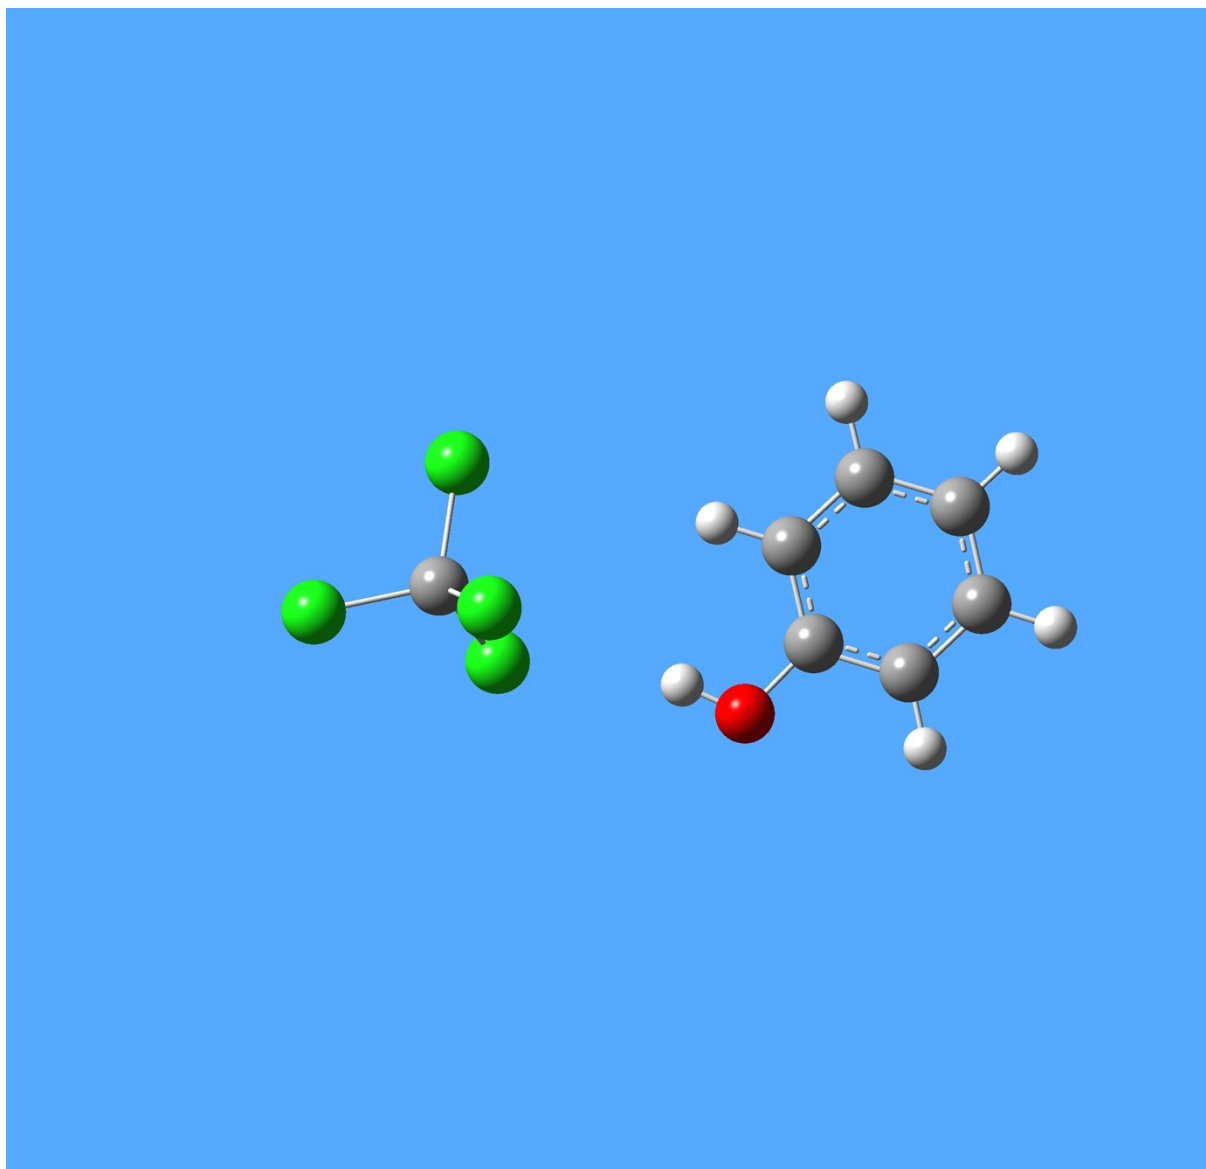

Figure S15. Optimized (B3LYP/6-311++G(2df,2pd)) structure of phenol-CCl<sub>4</sub> complex.

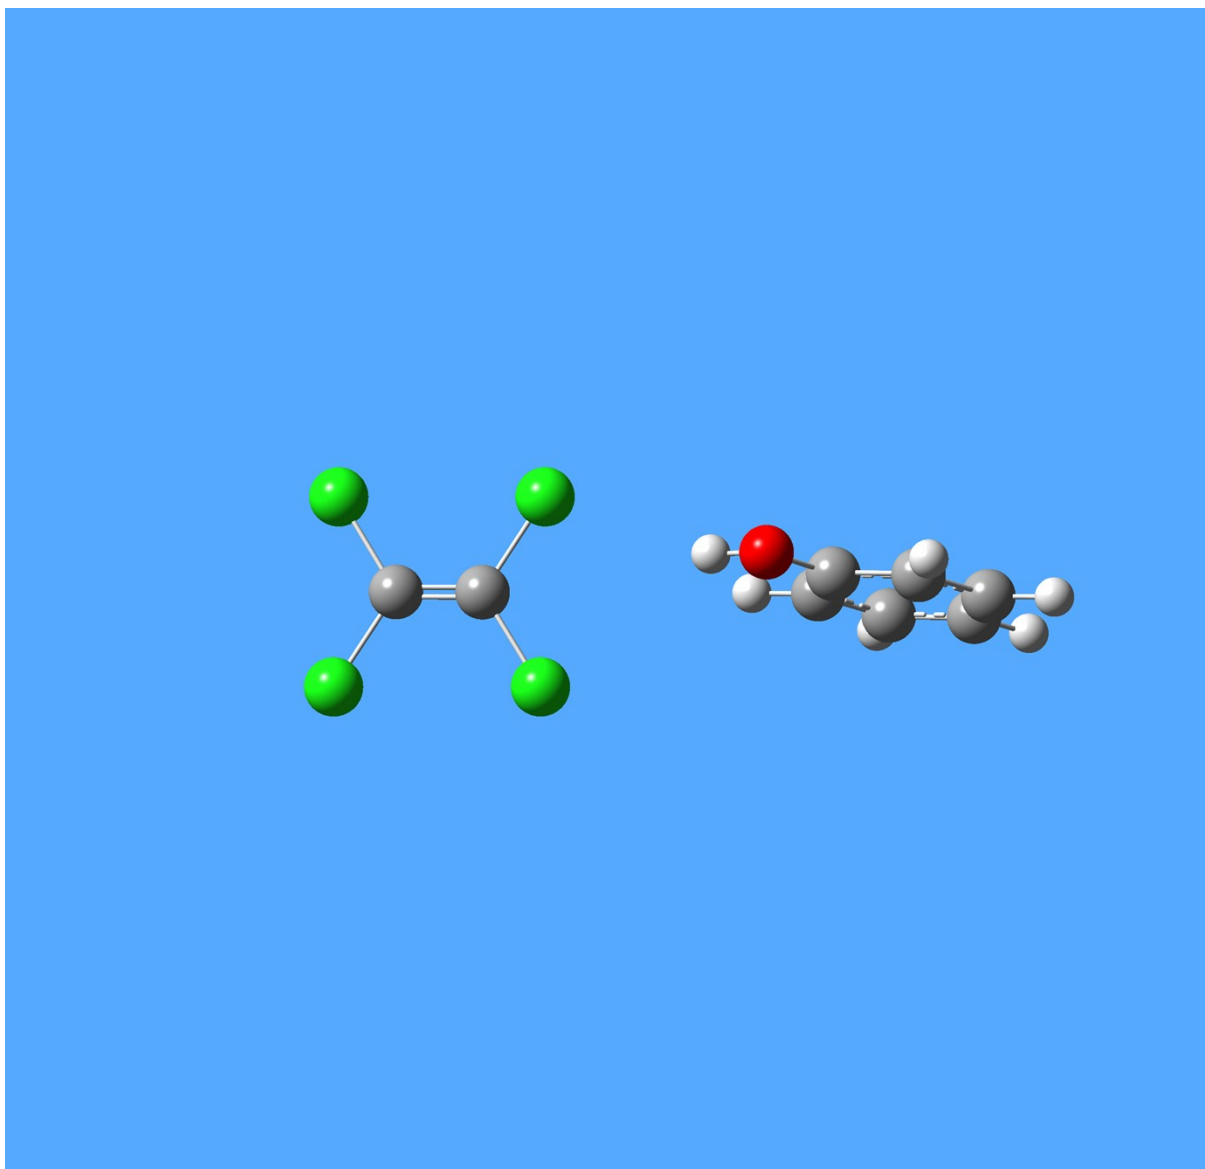

Figure S16. Optimized (B3LYP/6-311++G(2df,2pd)) structure of phenol-tetrachloroethylene complex.

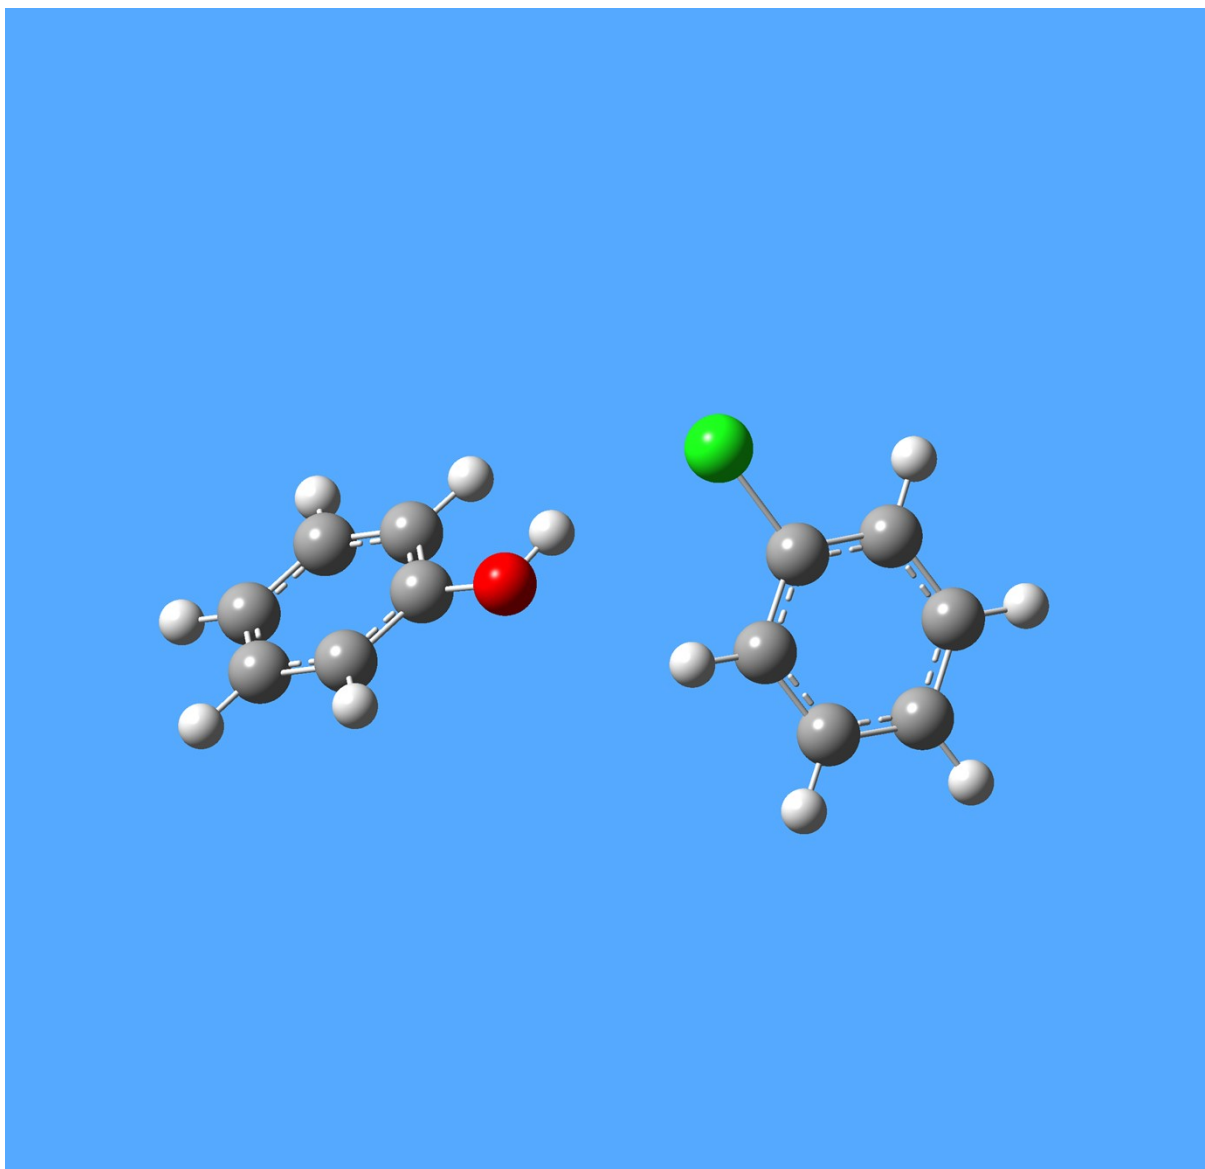

Figure S17. Optimized (B3LYP/6-311++G(2df,2pd)) structure of phenol-chlorobenzene complex.
